# Supplementary material for: Integration of conductive MOF and MXene for high-performance supercapacitor
Source: Royal Society of Chemistry journal article supplement (doi:10.1039/d3nj05392j), 2024-01-01
Supplement: d3nj05392j1.pdf [file d3nj05392j1.pdf]

## Supporting Information

### Integration of Conductive MOF and MXene for High-Performance Supercapacitor

Rongmei Zhu, Yijing Gu, Limei Liu, Jiadan Lu and Huan Pang\*

---

*R. Zhu, Y. Gu, L. Liu, J. Lu, Prof. H. Pang*

*School of Chemistry and Chemical Engineering, Yangzhou University, Yangzhou, 225009, Jiangsu (P. R. China)*

E-mail: huanpangchem@hotmail.com, panghuan@yzu.edu.cn

Electronic Supplementary Information (ESI) available. See DOI: 10.1039/x0xx00000x

## Table of Content

|                                                           |    |
|-----------------------------------------------------------|----|
| Characterization.....                                     | 3  |
| Electrochemical measurement .....                         | 3  |
| Asymmetric supercapacitor assembly and measurements ..... | 4  |
| Table S1.....                                             | 5  |
| Fig. S1. ....                                             | 6  |
| Fig. S2 .....                                             | 7  |
| Fig. S3 .....                                             | 8  |
| Fig. S4 .....                                             | 9  |
| Fig. S5 .....                                             | 10 |
| Fig. S6 .....                                             | 11 |
| Fig. S7 .....                                             | 12 |
| Fig. S8 .....                                             | 13 |
| Fig. S9 .....                                             | 14 |
| Fig. S10 .....                                            | 15 |
| Fig. S11 .....                                            | 16 |
| Fig. S12 .....                                            | 17 |
| Fig. S13 .....                                            | 18 |
| Fig. S14 .....                                            | 19 |

## Characterization

XRD patterns were examined on a Bruker D8 Advance X-ray diffractometer (Cu-K $\alpha$  radiation:  $\lambda=0.15406$  nm). XPS measurement was carried out using an Axis Ultra X-ray photoelectron spectrometer (Kratos Analytical Ltd., UK) equipped with Al-K $\alpha$  source ( $h\nu = 1486.6$  eV). The morphological characteristics of the sample were observed using a field emission scanning electron microscope (Zeiss\_Supra55) at an acceleration voltage of 5.0 KV. TEM images, SAED images, and EDS mapping images were captured on a Tecnai G2 F30 transmission electron microscope with an acceleration voltage of 300 kV.

## Electrochemical measurement

All electrochemical measurements were conducted in a typical three-electrode electrochemical cell, which contained a 3 M KOH aqueous solution as the electrolyte. The working electrode (WE) consisted of nickel foam with active materials. The Hg/HgO electrode served as the reference electrode (RE), and the counter electrode (CE) was a Pt electrode. Cyclic voltammetry (CV) measurements were performed on a CHI760e electrochemical workstation. The working electrode was made by mixing the as-prepared sample powder, acetylene black, and polytetrafluoroethylene at a weight ratio of 80:15:5, respectively. Then, a piece of nickel foam size of approximately  $1 \times 1$  cm was coated by above powder. Then, the nickel foam was pressed into a thin foil at a pressure of 8 MPa. The mass loading of the active material on the electrodes is about 2 mg. The electrochemical capacitive performance of the electrodes can be measured by cyclic voltammetry (CV), galvanostatic charge/discharge (GDC) curves and stability test. The specific capacity can be calculated from the GCD curves through equations:

$$C_m = \frac{I \Delta t}{m \Delta V}$$

## Asymmetric supercapacitor assembly and measurements

For asymmetric supercapacitor (ASC) device, the as-synthesized MXene@Ni-HHTP-*x* and activated carbon (AC) used as positive and negative electrodes, respectively, which was investigated in 3 M KOH. The negative electrode was prepared by using a similar procedure with positive electrode. The AC was produced by Shenzhen Naxin Material Co., Ltd whose type is YEC-8. The specific surface area and bulk density of AC (YEC-8) are about 2000 m<sup>2</sup>/g and 0.4 g/mL, respectively. Similar as before, the negative electrode was made by mixing the as-prepared AC, acetylene black, and polytetrafluoroethylene at a weight ratio of 80:15:5, respectively. To balance the charges between the positive and negative electrodes, the load-bearing ratio of MXene@Ni-HHTP-2 to AC on nickel foam is about 2 : 5.4. Then, the above powder was coated on a piece of nickel foam, approximately 1 × 1 cm<sup>2</sup>. Then, the nickel foam was pressed into a thin foil at a pressure of 8 MPa. The mass loading of the active material on the electrodes is about 2 mg. Then, the nickel foam was pressed into a thin foil at a pressure of 8 MPa. The mass loading of the active material on the electrodes is about 2 mg and the mass ratio of the positive electrode and negative electrode was about 1:1. The energy density (E, W h kg<sup>-1</sup>) and power density (P, W kg<sup>-1</sup>) were calculated through equations:

$$E = \frac{C \Delta V^2}{7.2}$$

$$P = \frac{E \times 3600}{\Delta t}$$

**Table S1.** Experimental reaction formula of MXene@cMOF-*x*

| Name     | MXene (mg) | HHTP (mg) | Ni(OAc) <sub>2</sub> ·4H <sub>2</sub> O (mg) |
|----------|------------|-----------|----------------------------------------------|
| M@cMOF-1 | 5          | 3.5       | 5                                            |
| M@cMOF-2 | 10         | 3.5       | 5                                            |
| M@cMOF-3 | 20         | 3.5       | 5                                            |
| M@cMOF-4 | 40         | 3.5       | 5                                            |
| M@cMOF-5 | 100        | 3.5       | 5                                            |
| M@cMOF-6 | 10         | 1.7       | 2.5                                          |
| M@cMOF-7 | 10         | 7         | 10                                           |
| M@cMOF-8 | 10         | 7         | 0                                            |

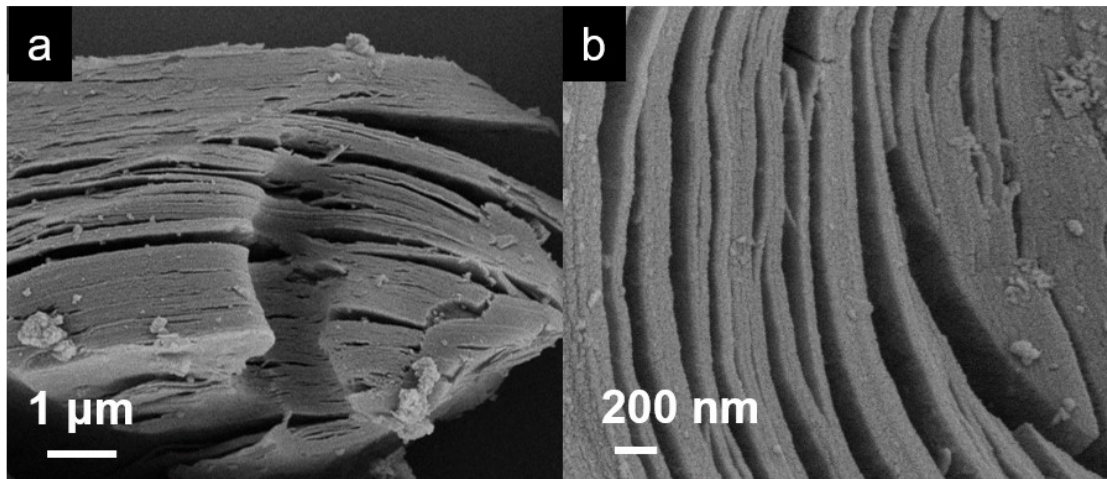

**Fig. S1.** (a-b) SEM images of MXene with different magnifications.

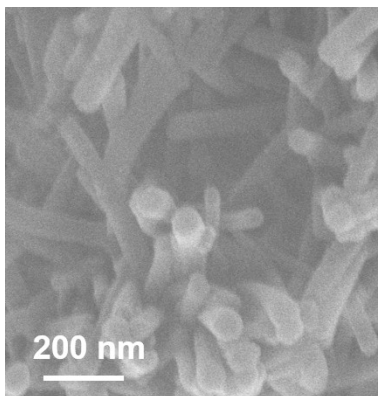

**Fig. S2.** SEM image of Ni-HHTP.

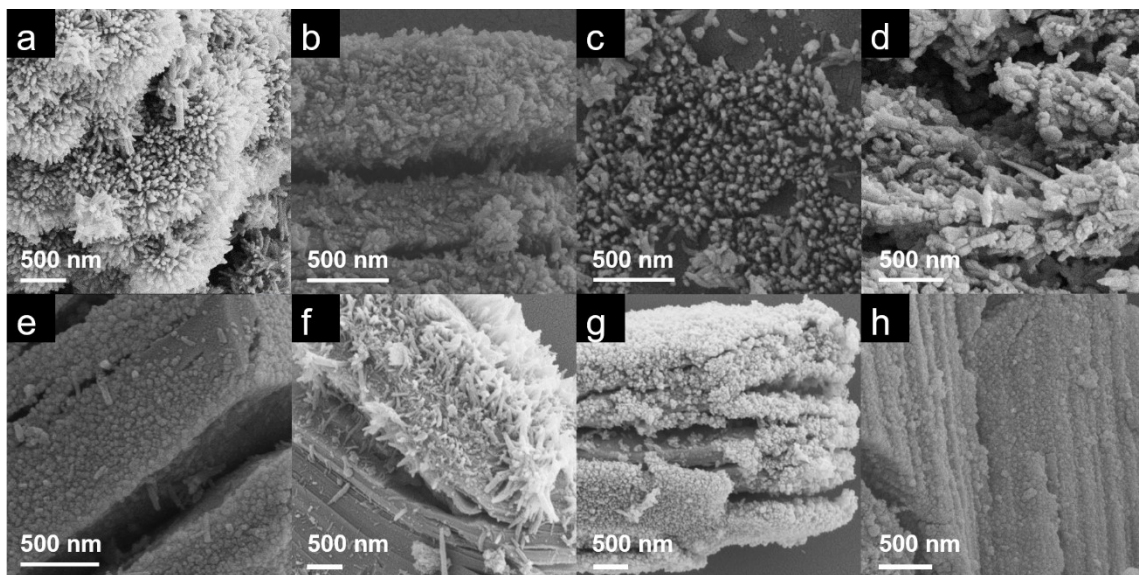

**Fig. S3.** (a-h) SEM images of M@cMOF-1~8.



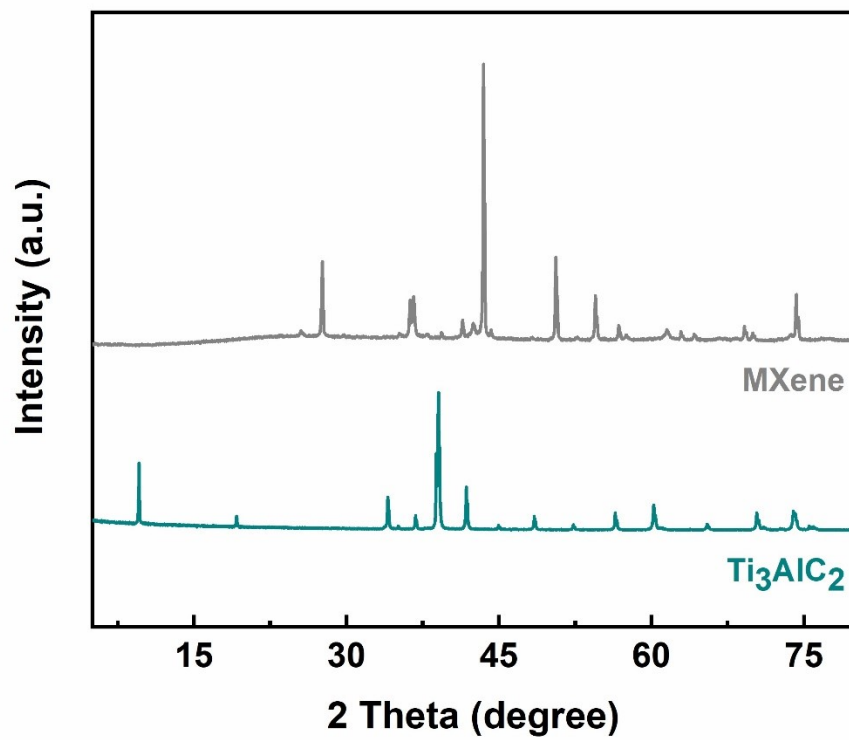

**Fig. S4.** XRD patterns of Ti<sub>3</sub>AlC<sub>2</sub> and MXene.

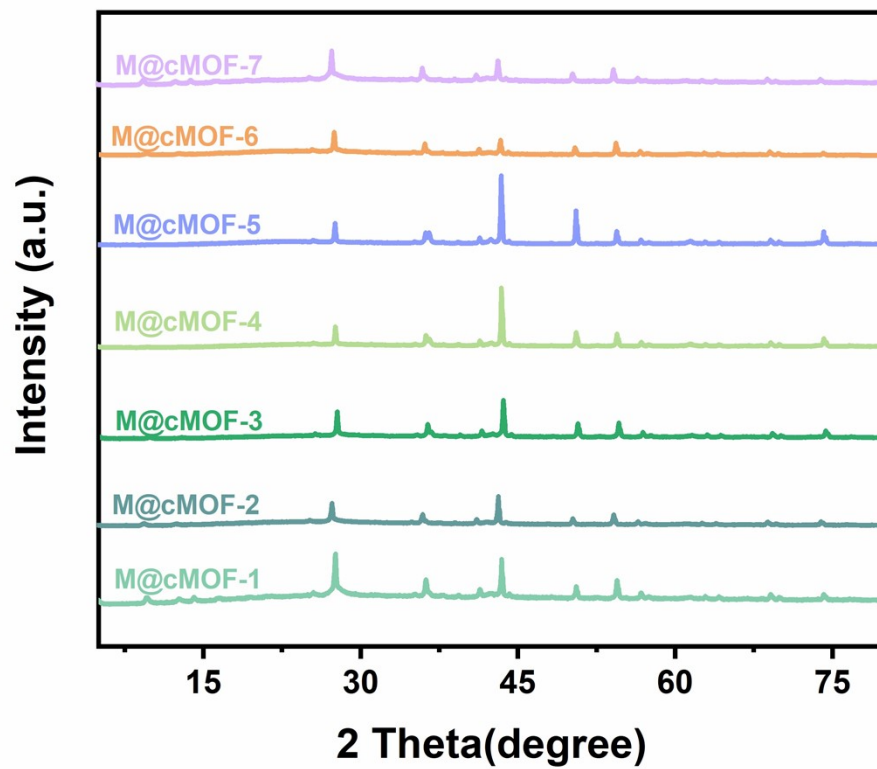

Fig. S5. XRD patterns of M@cMOF-1~7.

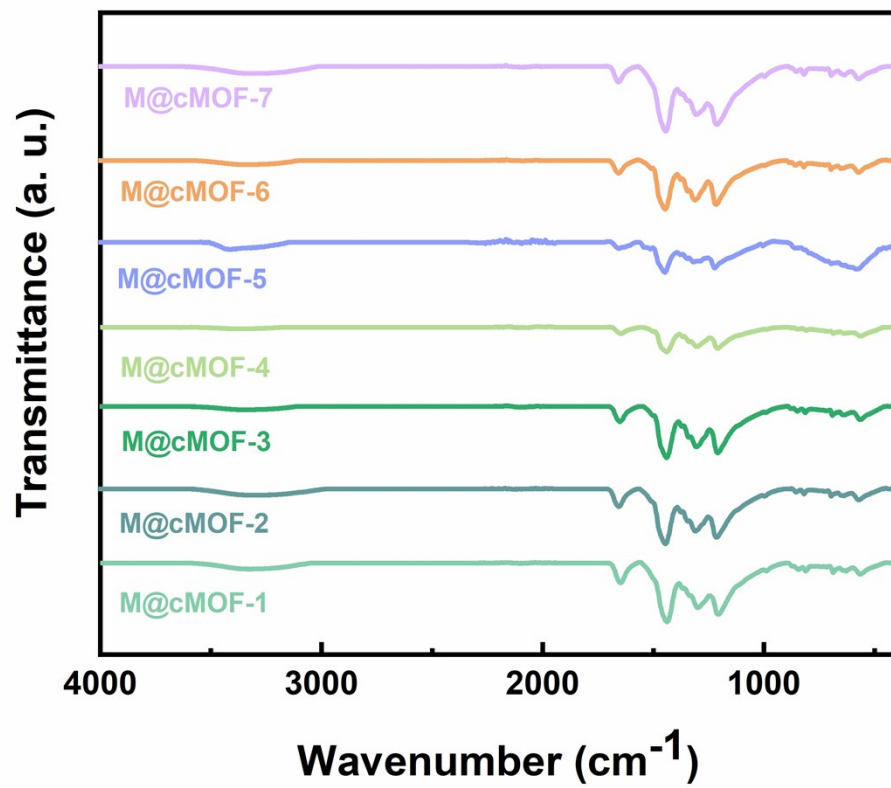

Fig. S6. FT-IR spectra of M@cMOF-1~7.

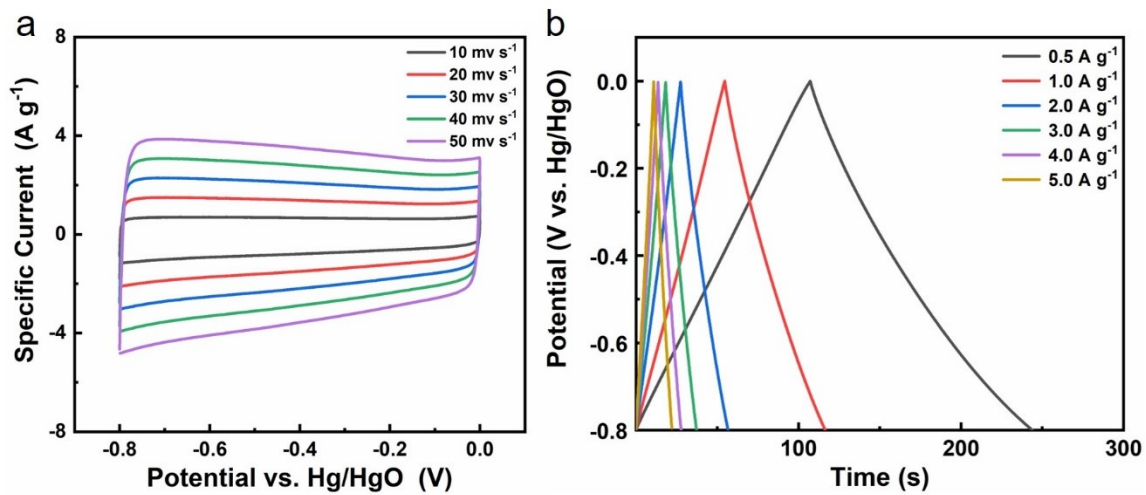

Fig. S7. CV and GCD curves of activated carbon.

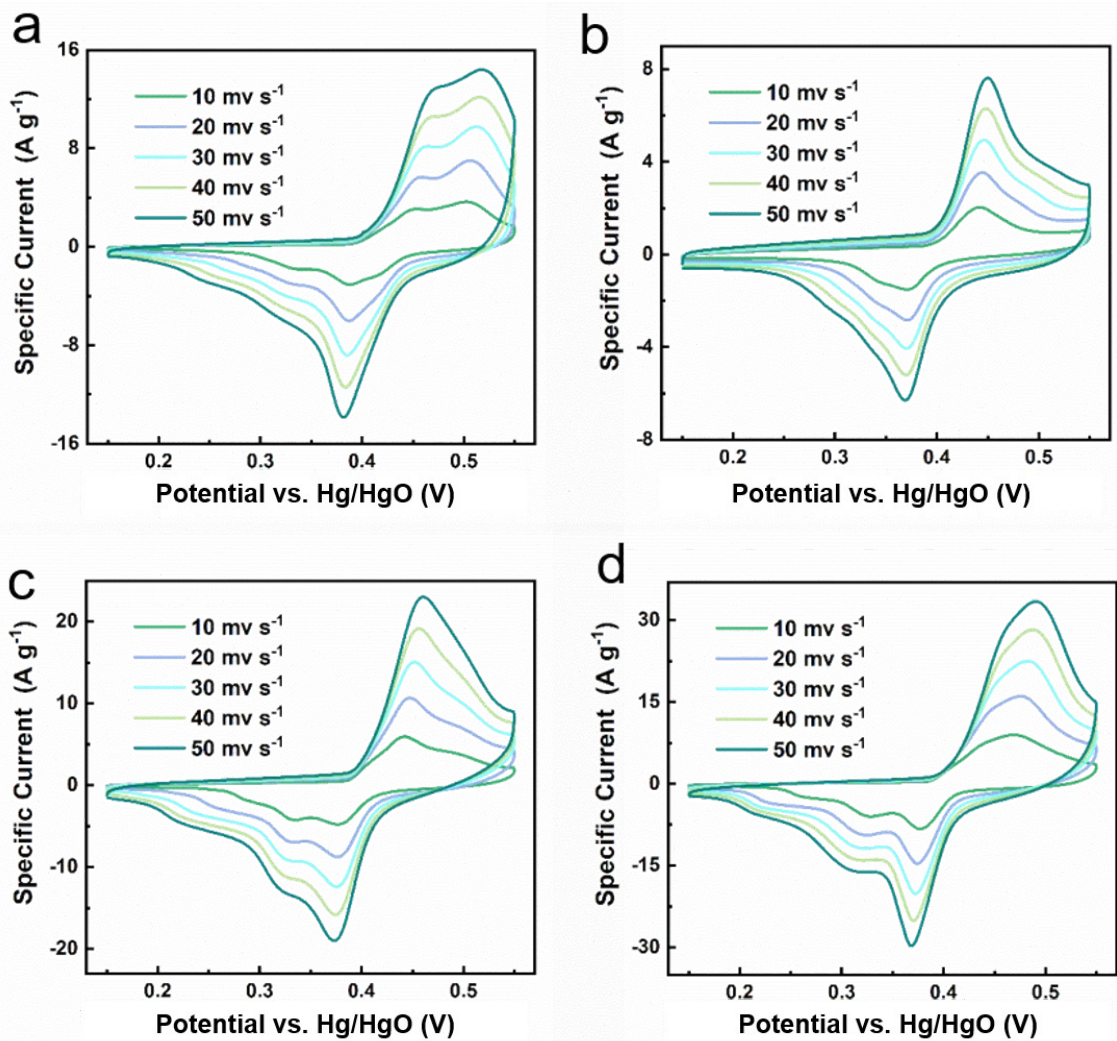

**Fig. S8.** CV curves of (a) MXene and (b-d) M@cMOF-1~3 at different scan rates in a three-electrode system.

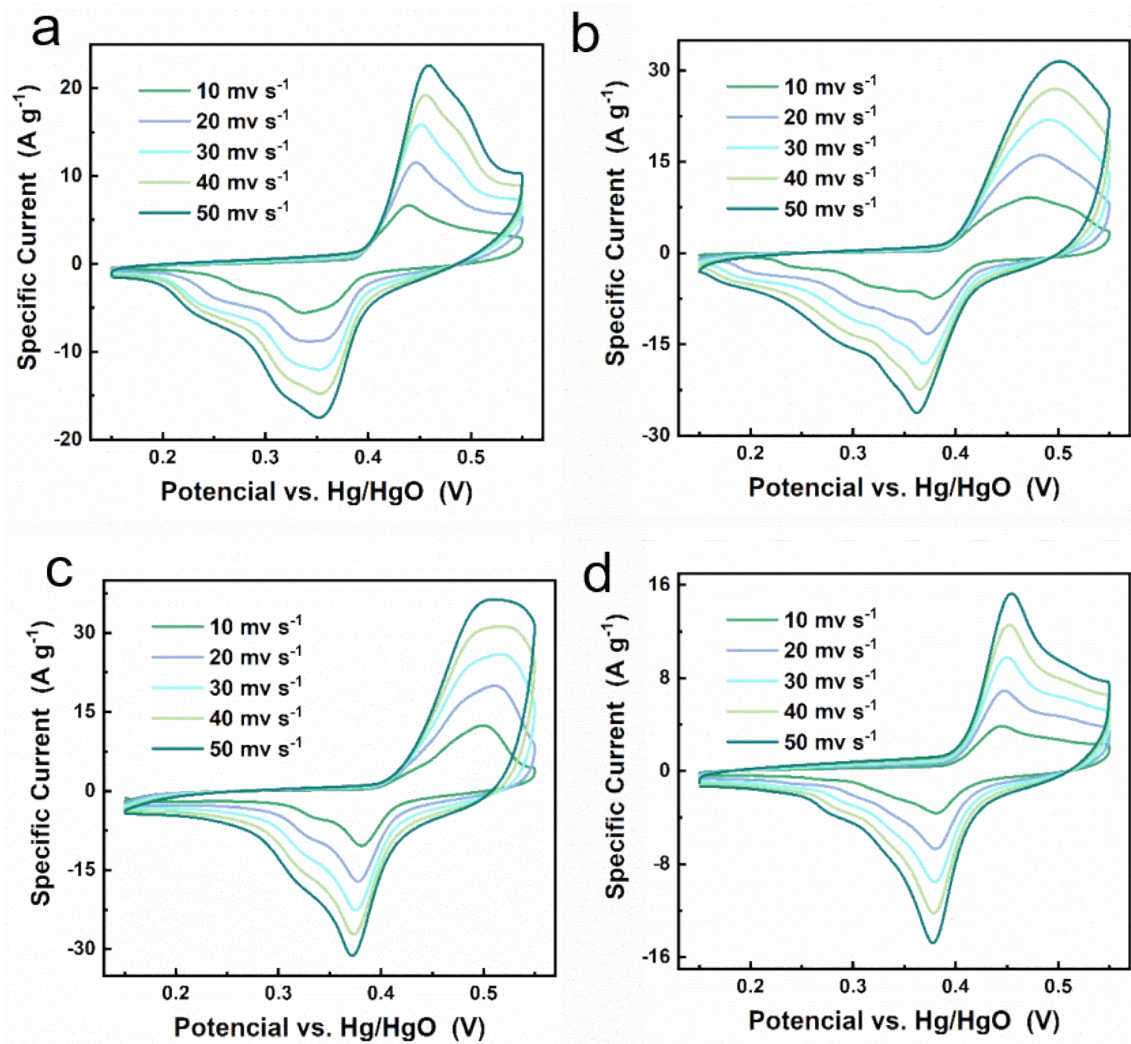

**Fig. S9.** CV curves of (a-d)  $\text{M@cMOF-4}\sim\text{7}$  at different scan rates in a three-electrode system.

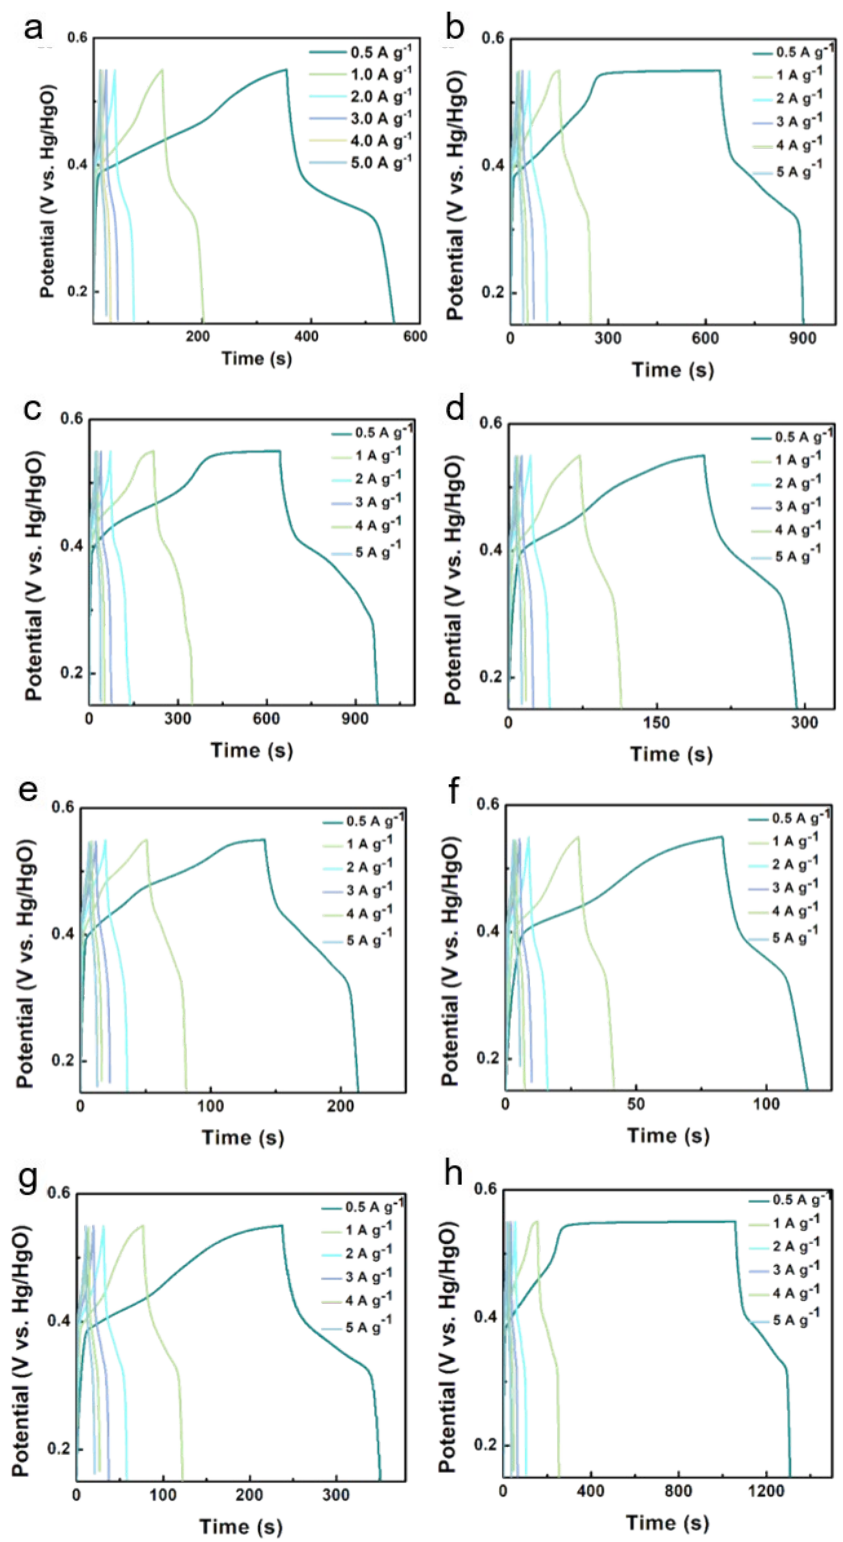

**Fig. S10.** GCD curves of (a) MXene and (b-f) M@cMOF-1~7 at different current densities in a three-electrode system.

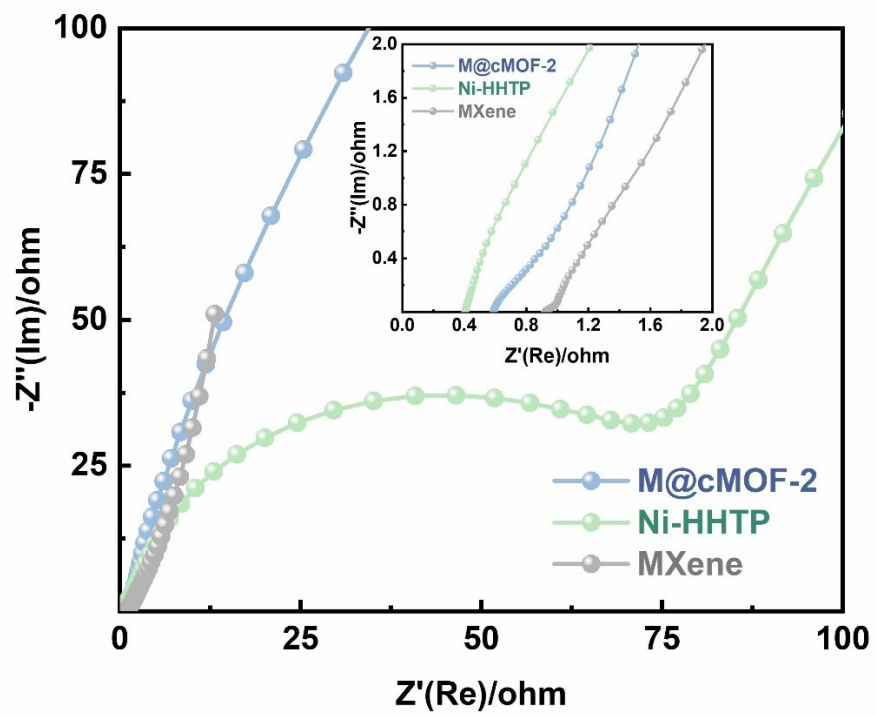

**Fig. S11.** Nyquist plots of MXene, Ni-HHTP and M@cMOF-2. Insets: magnified high-frequency region.



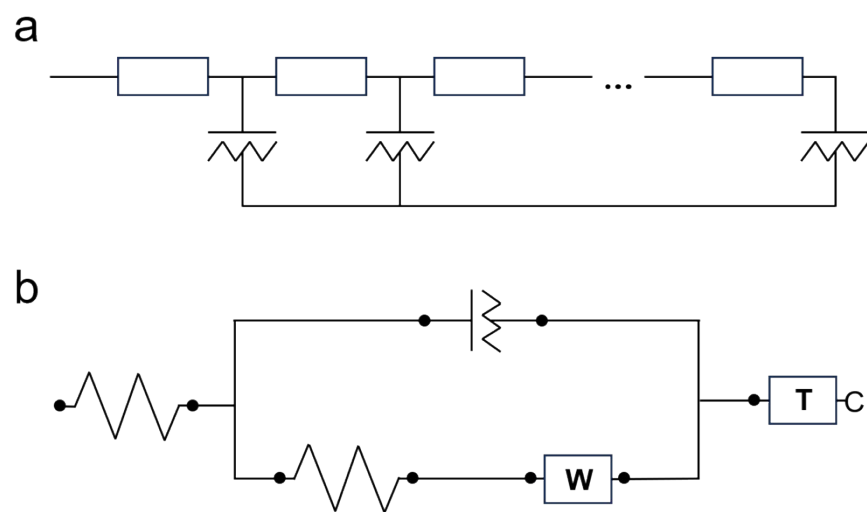

**Fig. S12.** The fitted equivalent circuits of (a)MXene, M@cMOF-2 and (b) Ni-HHTP.

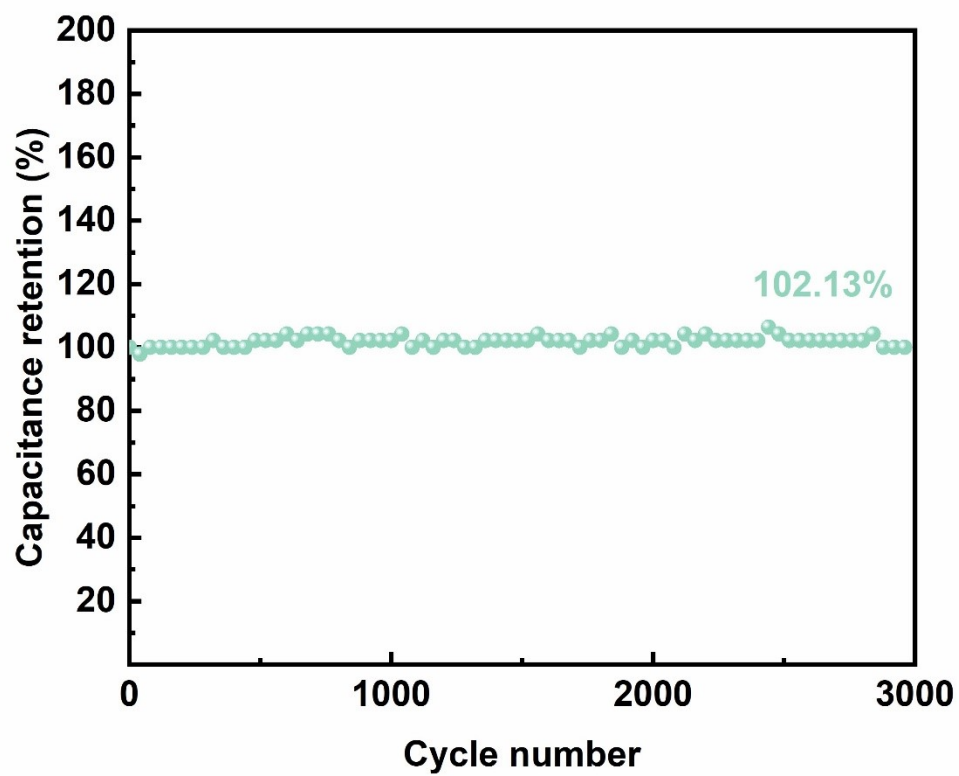

Fig. S13. Cycling stability of M@cMOF-2 at 3 A g<sup>-1</sup> for 3000 cycles.

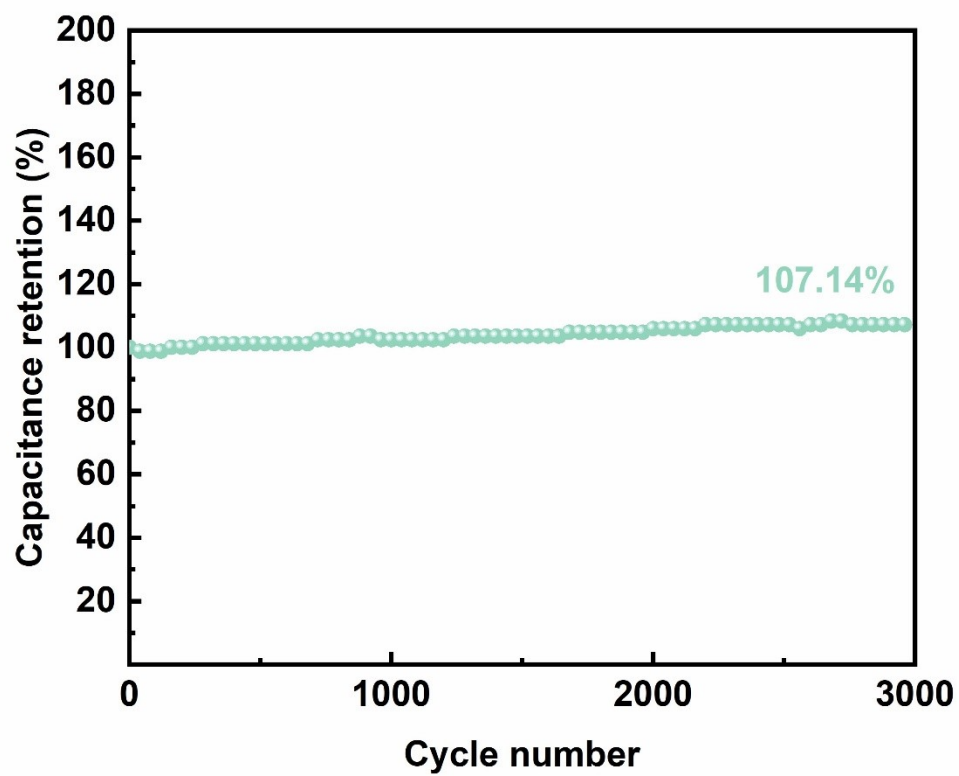

**Fig. S14.** Cycling stability of M@cMOF-2//AC aqueous asymmetric supercapacitor at 3 A g<sup>-1</sup> for 3000 cycles.
